# Supplementary material for: Protein profile in Aspergillus nidulans recombinant strains overproducing heterologous enzymes
Source: PubMed Central journal article supplement (PMC5812239; doi:10.1111/1751-7915.13027), 2018-01-08
Supplement: MBT2-11-346-s001.pdf [file MBT2-11-346-s001.pdf]

**A**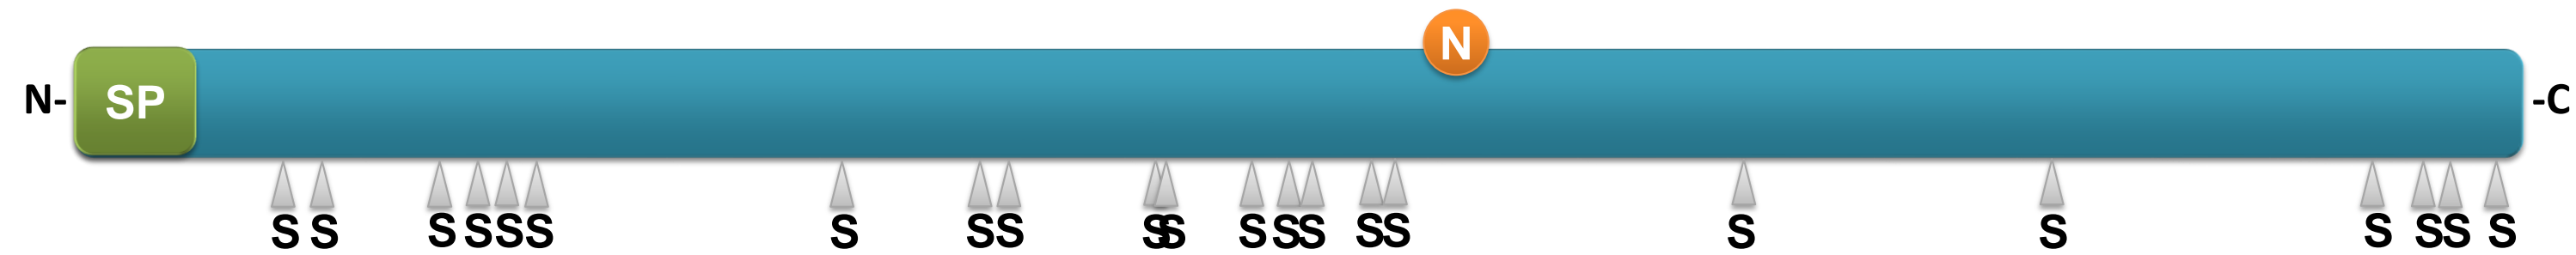**B**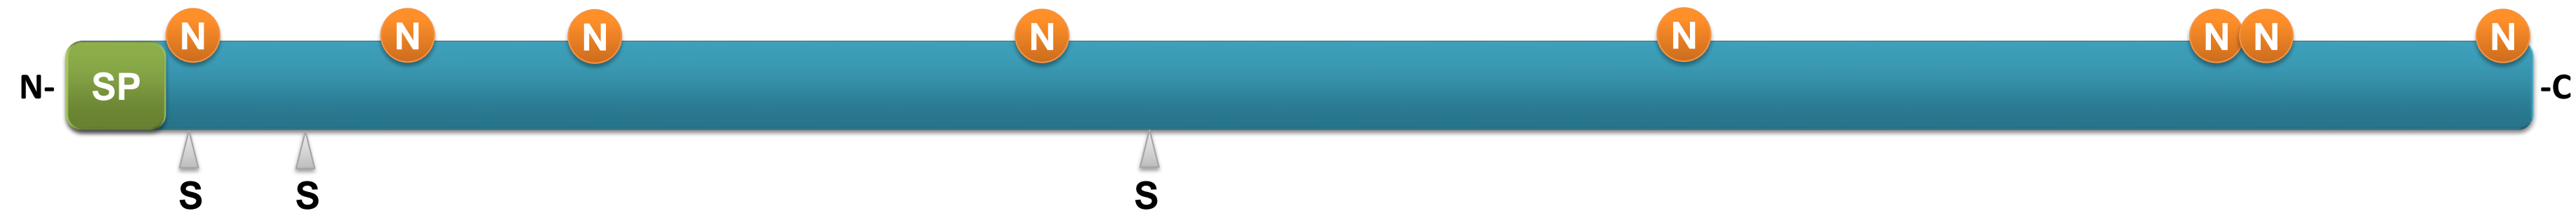**Fig. S1**
