# Supplementary material for: Protein profile in Aspergillus nidulans recombinant strains overproducing heterologous enzymes
Source: PubMed Central journal article supplement (PMC5812239; doi:10.1111/1751-7915.13027), 2018-01-08
Supplement: MBT2-11-346-s005.pdf [file MBT2-11-346-s005.pdf]

**Table S4: Oligonucleotides used in this study for qPCR analyses**

| <b>Gene</b>              | <b>Forward (5' to 3')</b> | <b>Reverse (5' to 3')</b> |
|--------------------------|---------------------------|---------------------------|
| <i>abfA</i> (Afu2g15160) | TTCTGGGTGCCGAAAGAAAC      | TGAGCATGGGTGCGTAGGT       |
| <i>cbhB</i> (Afu6g11610) | GCATGACCGTCGACACCAAG      | GGATCACCTTGCCGTTCTGC      |
| <i>tubC</i> (AN6838)     | ACTGCTCTGTGCTCTATG        | TGTGAACTGGTTGGAGAC        |
| <i>xlnR</i> (AN7610)     | TCGGTGGTTTTGGTGTCTCG      | GGCGACATCATCCACAGCTC      |
| <i>amyR</i> (AN2016)     | CCTCCCGTTCATCTTCCTG       | TGTTCATCCCAATCCCATGC      |
